# Supplementary material for: Hf(OTf)4-Catalyzed Three-Component Synthesis of N-Carbamate-Protected β-Amino Ketones
Source: MDPI journal article supplement (doi:10.3390/molecules27031122), 2022-02-08
Supplement: s1 [file s1]

## Supporting Information

### **Hf(OTf)<sub>4</sub>-catalyzed three-component synthesis of *N*-carbamate-protected β-amino ketones**

Zhen-Zhen Chen<sup>1</sup>, Dong-Zhao Yang<sup>1</sup>, Ying-Ying Dong<sup>1</sup>, Mei Chi<sup>1</sup>, Shou-Zhi Pu<sup>1,2,\*</sup> and Qi Sun<sup>1,\*</sup>

<sup>1</sup>*Jiangxi Key Laboratory of Organic Chemistry, Jiangxi Science and Technology Normal University, Nanchang, Jiangxi 330013, PR China*

<sup>2</sup>*Department of Ecology and Environment, Yuzhang Normal University, Nanchang, Jiangxi 330103, PR China*

Email: pushouzhi@tsinghua.org.cn (S.-Z.P.); sunqi@jxstnu.edu.cn (Q.S.)

#### Table of contents

|                                                                                                                                      |              |
|--------------------------------------------------------------------------------------------------------------------------------------|--------------|
| 1. Characterization data of known compounds <b>1–9</b> , <b>11</b> , and <b>13–17</b>                                                | Pages S2–S6  |
| 2. <sup>1</sup> H/ <sup>13</sup> C NMR, IR, and HRMS spectra of new compounds <b>10</b> , <b>12</b> and <b>18–20</b> (Figure S1–S20) | Pages S7–S16 |
| 3. References                                                                                                                        | Page S17     |

## 1. Characterization data of known compounds 1–9, 11, and 13–17

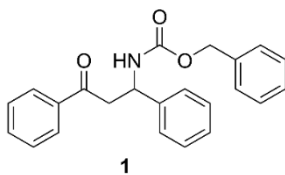

**Benzyl (3-oxo-1,3-diphenylpropyl)carbamate (1):** a white solid; mp 114–115°C;  $^1\text{H}$  NMR (400 MHz,  $\text{CDCl}_3$ ):  $\delta$  7.89 (d,  $J = 7.6$  Hz, 2H), 7.56 (t,  $J = 7.4$  Hz, 1H), 7.43 (t,  $J = 7.6$  Hz, 2H), 7.36–7.22 (m, 10H), 5.91 (br, 1H), 5.43–5.29 (m, 1H), 5.13–5.06 (m, 2H), 3.70–3.68 (m, 1H), 3.52–3.35 (m, 1H);  $^{13}\text{C}$  NMR (100 MHz,  $\text{CDCl}_3$ ):  $\delta$  198.0, 155.9, 141.5, 136.9, 136.6, 133.5, 128.8 ( $\times 4$ ), 128.6 ( $\times 2$ ), 128.3 ( $\times 3$ ), 128.2 ( $\times 2$ ), 127.7, 126.6 ( $\times 2$ ), 67.0, 52.1, 44.2; IR (KBr):  $\nu_{\text{max}}$  3312, 3031, 2923, 1694, 1606, 1530, 1454, 1408, 1259, 1182, 1043, 812, 745  $\text{cm}^{-1}$ ; LRMS (ESI $^{+}$ ):  $m/z$  calcd for  $\text{C}_{23}\text{H}_{22}\text{NO}_3$   $[\text{M}+\text{H}]^{+}$  360.2; found 360.2.<sup>[1,2]</sup>

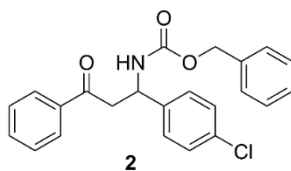

**Benzyl (1-(4-chlorophenyl)-3-oxo-3-phenylpropyl)carbamate (2):** a white solid; mp 120–121°C;  $^1\text{H}$  NMR (400 MHz,  $\text{CDCl}_3$ ):  $\delta$  7.86 (d,  $J = 7.6$  Hz, 2H), 7.56 (t,  $J = 7.6$  Hz, 1H), 7.41 (dd,  $J_1 = J_2 = 7.6$  Hz, 2H), 7.36–7.24 (m, 9H), 6.01 (br, 1H), 5.29 (dt,  $J_1 = J_2 = 6.7$  Hz, 1H), 5.13–5.04 (m, 2H), 3.68–3.60 (m, 1H), 3.46–3.38 (m, 1H);  $^{13}\text{C}$  NMR (100 MHz,  $\text{CDCl}_3$ ):  $\delta$  197.8, 155.7, 140.1, 136.6, 136.3, 133.6, 133.2, 128.8 ( $\times 4$ ), 128.5 ( $\times 2$ ), 128.1, ( $\times 4$ ), 127.8 ( $\times 3$ ), 66.9, 51.3, 43.8; IR (KBr):  $\nu_{\text{max}}$  3062, 3030, 2953, 1693, 1596, 1580, 1525, 1449, 1407, 1249, 1042, 1001, 748  $\text{cm}^{-1}$ ; LRMS (ESI $^{+}$ ):  $m/z$  calcd for  $\text{C}_{23}\text{H}_{21}\text{ClNO}_3$   $[\text{M}+\text{H}]^{+}$  394.1; found 394.1.<sup>[1,2]</sup>

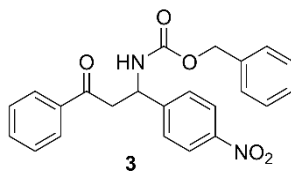

**Benzyl (1-(4-nitrophenyl)-3-oxo-3-phenylpropyl)carbamate (3):** a white solid; mp 143–144°C;  $^1\text{H}$  NMR (400 MHz,  $\text{CDCl}_3$ ):  $\delta$  8.17 (d,  $J = 8.4$  Hz, 2H), 7.88 (d,  $J = 7.6$  Hz, 2H), 7.59 (t,  $J = 7.6$  Hz, 1H), 7.54 (d,  $J = 8.4$  Hz, 2H), 7.45 (dd,  $J_1 = J_2 = 7.6$  Hz, 2H), 7.40–7.29 (m, 5H), 6.15 (br, 1H), 5.45–5.33 (m, 1H), 5.13–5.09 (m, 2H), 3.83–3.66 (m, 1H), 3.59–3.41 (m, 1H);  $^{13}\text{C}$  NMR (100 MHz,  $\text{CDCl}_3$ ):  $\delta$  197.5, 155.9, 148.8, 147.0, 136.6, 136.3, 133.9, 128.8 ( $\times 4$ ), 128.3 ( $\times 2$ ), 128.2 ( $\times 4$ ), 127.0, 123.8 ( $\times 2$ ), 66.6, 52.1, 43.2; IR (KBr):  $\nu_{\text{max}}$  3030, 2949, 2843, 1704, 1637, 1530, 1500, 1472, 1315, 1270, 1208, 1181, 1048, 975, 884, 765  $\text{cm}^{-1}$ ; LRMS (ESI $^{+}$ ):  $m/z$  calcd for  $\text{C}_{23}\text{H}_{20}\text{N}_2\text{O}_5$   $[\text{M}+\text{H}]^{+}$  405.1; found 405.1.<sup>[3]</sup>

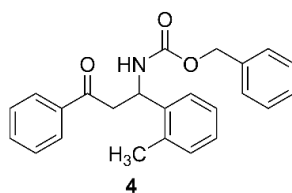

**Benzyl (3-oxo-3-phenyl-1-(*o*-tolyl)propyl)carbamate (4):** a white solid; mp 101–102 °C;  $^1\text{H}$  NMR (400 MHz,  $\text{CDCl}_3$ ):  $\delta$  7.89 (d,  $J = 7.7$  Hz, 2H), 7.55 (t,  $J = 7.7$  Hz, 1H), 7.43 (dd,  $J_1 = J_2 = 7.7$  Hz, 2H), 7.36–7.33 (m, 6H), 7.15 (m, 3H), 5.56 (br, 2H), 5.11–5.03 (m, 2H), 3.64–3.60 (m, 1H), 3.48–3.45 (m, 1H), 2.45 (s, 3H);  $^{13}\text{C}$  NMR (100 MHz,  $\text{CDCl}_3$ ):  $\delta$  197.9, 155.7, 139.5, 136.9, 136.6, 135.8, 133.5 ( $\times 2$ ), 131.0 ( $\times 2$ ), 128.8 ( $\times 2$ ), 128.7 ( $\times 2$ ), 128.3 ( $\times 2$ ), 127.7 ( $\times 2$ ), 126.5, 125.6, 67.0, 48.6, 43.7, 19.5; IR (KBr):  $\nu_{\text{max}}$  3321, 3032, 2926, 1691, 1596, 1492, 1449, 1408, 1256, 1091, 1044, 830, 754  $\text{cm}^{-1}$ ; LRMS (ESI $^{+}$ ):  $m/z$  calcd for  $\text{C}_{24}\text{H}_{24}\text{NO}_3$   $[\text{M}+\text{H}]^{+}$  374.2; found 374.2.<sup>[1]</sup>

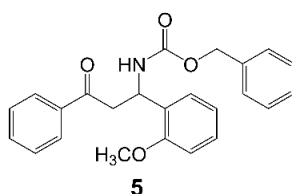

**Benzyl (1-(2-methoxyphenyl)-3-oxo-3-phenylpropyl)carbamate (5):** a white solid; mp 71–72 °C;  $^1\text{H}$  NMR (400 MHz,  $\text{CDCl}_3$ ):  $\delta$  7.91 (d,  $J = 7.6$  Hz, 2H), 7.54 (t,  $J = 7.6$  Hz, 1H), 7.42 (dd,  $J_1 = J_2 = 7.6$  Hz, 2H), 7.38–7.35 (m, 6H), 7.23 (t,  $J = 7.9$  Hz, 1H), 6.93 (t,  $J = 7.5$  Hz, 1H), 6.87 (d,  $J = 8.2$  Hz, 1H), 6.15 (br, 1H), 5.57–5.52 (m, 1H), 5.12–5.05 (m, 2H), 3.86 (s, 3H), 3.62–3.49 (m, 2H);  $^{13}\text{C}$  NMR (100 MHz,  $\text{CDCl}_3$ ):  $\delta$  198.3, 156.7, 155.7, 136.9, 136.7, 136.4, 133.2 ( $\times 2$ ), 128.8 ( $\times 2$ ), 128.7 ( $\times 2$ ), 128.6 ( $\times 2$ ), 128.3 ( $\times 2$ ), 128.2 ( $\times 2$ ), 120.9, 110.8, 66.8, 55.4, 49.8, 43.5; IR (KBr):  $\nu_{\text{max}}$  3431, 3063, 3033, 2955, 2838, 1687, 1599, 1493, 1448, 1401, 1340, 1245, 1048, 752  $\text{cm}^{-1}$ ; LRMS (ESI $^{+}$ ):  $m/z$  calcd for  $\text{C}_{24}\text{H}_{24}\text{NO}_4$   $[\text{M}+\text{H}]^{+}$  390.2; found 390.2.<sup>[3]</sup>

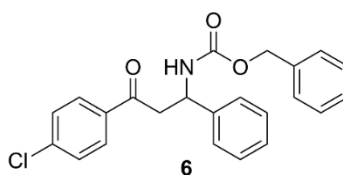

**Benzyl (3-(4-chlorophenyl)-3-oxo-1-phenylpropyl)carbamate (6):** a white solid; mp 98–99 °C;  $^1\text{H}$  NMR (400 MHz,  $\text{CDCl}_3$ ):  $\delta$  7.81 (d,  $J = 8.1$  Hz, 2H), 7.39 (d,  $J = 8.4$  Hz, 2H), 7.33–7.25 (m, 10H), 5.83 (br, 1H), 5.32 (dt,  $J_1 = J_2 = 6.1$  Hz, 1H), 5.12–5.06 (m, 2H), 3.68 (br, 1H), 3.39 (dd,  $J_1 = 5.8$  Hz,  $J_2 = 16.6$  Hz, 1H);  $^{13}\text{C}$  NMR (100 MHz,  $\text{CDCl}_3$ ):  $\delta$  196.8, 155.8, 141.2, 140.1, 136.5, 135.1, 129.7 ( $\times 2$ ), 129.1 ( $\times 2$ ), 128.9, 128.7, 128.3 ( $\times 4$ ), 127.8, 126.5 ( $\times 2$ ), 67.0, 52.1, 44.2; IR (KBr):  $\nu_{\text{max}}$  3311, 3030, 2922, 1697, 1606, 1528, 1454, 1407, 1259, 1181, 1043, 812, 745  $\text{cm}^{-1}$ ; LRMS (ESI $^{+}$ ):  $m/z$  calcd for  $\text{C}_{23}\text{H}_{21}\text{ClNO}_3$   $[\text{M}+\text{H}]^{+}$  394.1; found 394.1.<sup>[2]</sup>

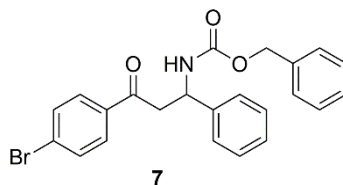

**Benzyl (3-(4-bromophenyl)-3-oxo-1-phenylpropyl)carbamate (7):** a white solid; mp 107–108 °C; <sup>1</sup>H NMR (400 MHz, CDCl<sub>3</sub>): δ 7.71 (d, *J* = 8.0 Hz, 2H), 7.54 (d, *J* = 8.4 Hz, 2H), 7.26–7.09 (m, 10H), 5.86 (br, 1H), 5.38–5.24 (m, 1H), 5.09–5.00 (m, 2H), 3.70–3.58 (m, 1H), 3.31–3.17 (m, 1H); <sup>13</sup>C NMR (100 MHz, CDCl<sub>3</sub>): δ 196.9, 155.8, 141.2, 136.5, 135.1, 132.1, 129.7 (×2), 128.9 (×2), 128.7, 128.6, 128.3 (×4), 127.7, 126.5 (×2), 67.0, 52.0, 44.2; IR (KBr): ν<sub>max</sub> 3342, 3011, 2930, 1680, 1581, 1530, 1495, 1447, 1395, 1376, 1334, 1256, 1217, 1068, 1030, 829, 748 cm<sup>-1</sup>; LRMS (ESI<sup>+</sup>): *m/z* calcd for C<sub>23</sub>H<sub>21</sub>BrNO<sub>3</sub> [M+H]<sup>+</sup> 437.1; found 437.1.<sup>[2]</sup>

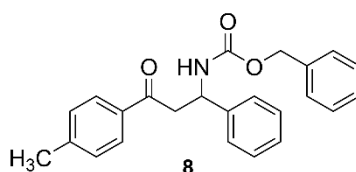

**Benzyl (3-oxo-1-phenyl-3-(*p*-tolyl)propyl)carbamate (8):** a white solid; mp 83–84 °C; <sup>1</sup>H NMR (400 MHz, CDCl<sub>3</sub>): δ 7.76 (d, *J* = 8.0 Hz, 2H), 7.33–7.26 (m, 9H), 7.23–7.19 (t, *J* = 8.3 Hz, 3H), 5.95 (br, 1H), 5.31 (dd, *J*<sub>1</sub> = *J*<sub>2</sub> = 6.0 Hz, 1H), 5.09–5.03 (m, 2H), 3.68–3.59 (m, 1H), 3.46–3.29 (m, 1H), 2.36 (s, 3H); <sup>13</sup>C NMR (100 MHz, CDCl<sub>3</sub>): δ 197.6, 155.8, 144.4, 141.6, 136.6, 134.3, 129.4 (×2), 128.7 (×2), 128.6 (×2), 128.3 (×2), 128.1 (×3), 127.5, 126.5 (×2), 66.9, 52.0, 43.9, 21.7; IR (KBr): ν<sub>max</sub> 3319, 3031, 2922, 1691, 1606, 1528, 1454, 1407, 1259, 1181, 1043, 811, 745 cm<sup>-1</sup>; LRMS (ESI<sup>+</sup>): *m/z* calcd for C<sub>24</sub>H<sub>24</sub>NO<sub>3</sub> [M+H]<sup>+</sup> 374.2; found 374.2.<sup>[2]</sup>

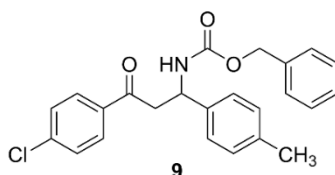

**Benzyl (3-(4-chlorophenyl)-3-oxo-1-(*p*-tolyl)propyl)carbamate (9):** a white solid; mp 135–136 °C; <sup>1</sup>H NMR (400 MHz, CDCl<sub>3</sub>): δ 7.82 (d, *J* = 8.2 Hz, 2H), 7.40 (d, *J* = 8.2 Hz, 2H), 7.36–7.30 (m, 5H), 7.22 (d, *J* = 7.9 Hz, 2H), 7.12 (d, *J* = 7.9 Hz, 2H), 5.74 (br, 1H), 5.27 (m, 1H), 5.09 (m, 2H), 3.74–3.64 (m, 1H), 3.47–3.31 (m, 1H), 2.31 (s, 3H); <sup>13</sup>C NMR (100 MHz, CDCl<sub>3</sub>): δ 196.9, 155.8, 140.0, 138.2, 137.5, 136.6, 135.2, 129.7 (×2), 129.6 (×2), 129.1 (×2), 128.8, 128.7, 128.3 (×2), 127.7, 126.5 (×2), 67.0, 51.9, 44.4, 21.2; IR (KBr): ν<sub>max</sub> 3430, 1690, 1595, 1491, 1449, 1413, 1368, 1220, 1091, 1048, 1014, 830, 754 cm<sup>-1</sup>; LRMS (ESI<sup>+</sup>): *m/z* calcd for C<sub>24</sub>H<sub>23</sub>ClNO<sub>3</sub> [M+H]<sup>+</sup> 408.1; found 408.1.<sup>[2]</sup>

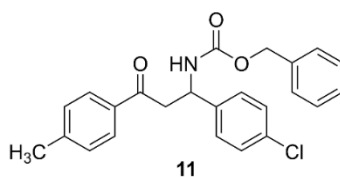

**Benzyl (1-(4-chlorophenyl)-3-oxo-3-(*p*-tolyl)propyl)carbamate (11):** a white solid; mp 125–126 °C; <sup>1</sup>H NMR (400 MHz, CDCl<sub>3</sub>): δ 7.77 (d, *J* = 7.8 Hz, 2H), 7.37–7.22 (m, 11H), 6.01 (br, 1H), 5.29–5.27 (m, 1H), 5.10–5.09 (m, 2H), 3.68–3.62 (m, 1H), 3.42–3.37 (m, 1H), 2.39 (s, 3H); <sup>13</sup>C NMR (100 MHz, CDCl<sub>3</sub>): δ 197.5, 155.9, 145.0, 144.7, 140.3, 136.5, 134.3, 133.3, 129.6 (×2), 128.9 (×2), 128.7 (×2), 128.4 (×4), 128.3, 128.0, 67.1, 51.6, 43.8, 21.8; IR (KBr): *v*<sub>max</sub> 3349, 1689, 1606, 1492, 1454, 1408, 1340, 1257, 1182, 1090, 1044, 1014, 812, 738 cm<sup>-1</sup>; LRMS (ESI<sup>+</sup>): *m/z* calcd for C<sub>24</sub>H<sub>23</sub>ClNO<sub>3</sub> [M+H]<sup>+</sup> 408.1; found 408.1.<sup>[2]</sup>

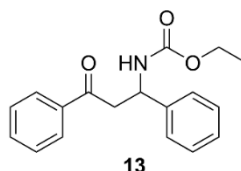

**Ethyl (3-oxo-1,3-diphenylpropyl)carbamate (13):** a white solid; mp 128–129 °C; <sup>1</sup>H NMR (400 MHz, CDCl<sub>3</sub>): δ 7.90 (d, *J* = 7.6 Hz, 2H), 7.55 (t, *J* = 7.6 Hz, 1H), 7.43 (dd, *J*<sub>1</sub> = *J*<sub>2</sub> = 7.6 Hz, 2H), 7.36–7.21 (m, 5H), 5.83 (br, 1H), 5.34–5.29 (m, 1H), 4.09 (q, *J* = 7.0 Hz, 2H), 3.71–3.67 (m, 1H), 3.51–3.37 (m, 1H), 1.21 (m, 3H); <sup>13</sup>C NMR (100 MHz, CDCl<sub>3</sub>): δ 198.0, 156.1, 141.6, 136.8, 133.5, 128.7 (×4), 128.4 (×2), 127.5, 126.5 (×2), 61.0, 51.8, 44.2, 14.6; IR (KBr): *v*<sub>max</sub> 3333, 3062, 3030, 2980, 1691, 1597, 1531, 1449, 1409, 1259, 1047, 1002, 871, 751 cm<sup>-1</sup>; LRMS (ESI<sup>+</sup>): *m/z* calcd for C<sub>18</sub>H<sub>20</sub>NO<sub>3</sub> [M+H]<sup>+</sup> 298.1; found 298.1.<sup>[4,5]</sup>

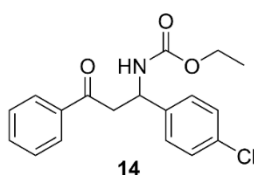

**Ethyl (1-(4-chlorophenyl)-3-oxo-3-phenylpropyl)carbamate (14):** a white solid; mp 112–113 °C; <sup>1</sup>H NMR (400 MHz, CDCl<sub>3</sub>): δ 7.88 (d, *J* = 7.5 Hz, 2H), 7.55 (t, *J* = 7.5 Hz, 1H), 7.43 (dd, *J*<sub>1</sub> = *J*<sub>2</sub> = 7.5 Hz, 2H), 7.32–7.25 (m, 4H), 5.88 (br, 1H), 5.27 (m, 1H), 4.08 (q, *J* = 6.7 Hz, 2H), 3.68–3.64 (m, 1H), 3.49–3.36 (m, 1H), 1.20 (t, *J* = 6.7 Hz, 3H); <sup>13</sup>C NMR (100 MHz, CDCl<sub>3</sub>): δ 197.8, 156.1, 140.3, 136.7, 133.7 (×2), 133.3, 128.8 (×3), 128.2 (×2), 128.0 (×2), 61.2, 51.3, 44.0, 14.7; IR (KBr): *v*<sub>max</sub> 3242, 2943, 1920, 1667, 1395, 1336, 993, 815, 796 cm<sup>-1</sup>; LRMS (ESI<sup>+</sup>): *m/z* calcd for C<sub>18</sub>H<sub>19</sub>ClNO<sub>3</sub> [M+H]<sup>+</sup> 332.1; found 332.1.<sup>[6]</sup>

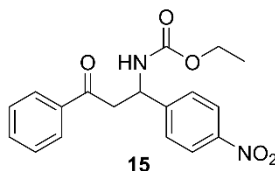

**Ethyl (1-(4-nitrophenyl)-3-oxo-3-phenylpropyl)carbamate (15):** a white solid; mp 133–134 °C; <sup>1</sup>H NMR (400 MHz, CDCl<sub>3</sub>): δ 8.18 (d, *J* = 8.2 Hz, 2H), 7.88 (d, *J* = 7.2 Hz, 2H), 7.69–7.50 (m, 3H), 7.49–7.41 (m, 2H), 6.05 (br, 1H), 5.40–5.35 (m, 1H), 4.10 (q, *J* = 6.6 Hz, 2H), 3.75–3.64 (m, 1H), 3.50–3.41 (m, 1H), 1.21 (t, *J* = 6.6 Hz, 3H); <sup>13</sup>C NMR (100 MHz, CDCl<sub>3</sub>): δ 197.7, 155.8, 148.8, 147.1, 136.3, 133.9, 128.7 (×4), 127.1 (×2), 123.9 (×2), 61.1, 51.8, 44.2, 14.6; IR (KBr): *v*<sub>max</sub>

3340, 2944, 1714, 1662, 1591, 1514, 1438, 1317, 1257, 1219, 1158, 1017, 983, 814, 751  $\text{cm}^{-1}$ ; LRMS (ESI<sup>+</sup>):  $m/z$  calcd for  $\text{C}_{18}\text{H}_{18}\text{N}_2\text{O}_5$   $[\text{M}+\text{H}]^+$  343.1; found 343.1.<sup>[4]</sup>

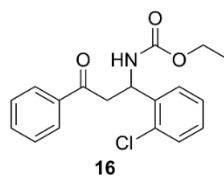

**Ethyl (1-(2-chlorophenyl)-3-oxo-3-phenylpropyl)carbamate (16):** a white solid; mp 128–129 °C;  $^1\text{H}$  NMR (400 MHz,  $\text{CDCl}_3$ ):  $\delta$  7.89 (d,  $J = 7.6$  Hz, 2H), 7.54 (t,  $J = 7.6$  Hz, 1H), 7.50 (d,  $J = 7.6$  Hz, 1H), 7.41 (dd,  $J_1 = J_2 = 7.6$  Hz, 2H), 7.33 (d,  $J = 7.6$  Hz, 1H), 7.22 (dd,  $J_1 = J_2 = 7.6$  Hz), 7.16 (dd,  $J_1 = J_2 = 7.6$  Hz), 6.15 (br, 1H), 5.67–5.58 (m, 1H), 4.07 (q,  $J = 6.8$  Hz, 2H), 3.76–3.57 (m, 1H), 3.54–3.41 (m, 1H), 1.32 (t,  $J = 6.8$  Hz, 3H);  $^{13}\text{C}$  NMR (100 MHz,  $\text{CDCl}_3$ ):  $\delta$  198.4, 155.9, 139.0, 136.7, 133.6, 132.4, 130.0, 128.8 ( $\times 2$ ), 128.3 ( $\times 4$ ), 127.2, 61.2, 49.8, 42.2, 14.6; IR (KBr):  $\nu_{\text{max}}$  2923, 1683, 1597, 1580, 1495, 1449, 1406, 1326, 1210, 1158, 1092, 814, 750  $\text{cm}^{-1}$ ; LRMS (ESI<sup>+</sup>):  $m/z$  calcd for  $\text{C}_{18}\text{H}_{19}\text{ClNO}_3$   $[\text{M}+\text{H}]^+$  332.1; found 332.1.<sup>[4,5]</sup>

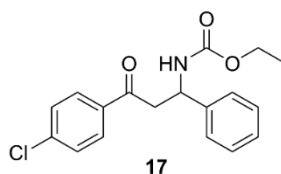

**Ethyl (3-(4-chlorophenyl)-3-oxo-1-phenylpropyl)carbamate (17):** a white solid; mp 114–115 °C;  $^1\text{H}$  NMR (400 MHz,  $\text{CDCl}_3$ ):  $\delta$  7.83 (d,  $J = 8.5$  Hz, 2H), 7.40 (d,  $J = 8.5$  Hz, 2H), 7.34–7.29 (m, 4H), 7.24 (m, 1H), 5.70 (br, 1H), 5.28 (m, 1H), 4.09 (q,  $J = 6.8$  Hz, 2H), 3.69–3.65 (m, 1H), 3.47–3.34 (m, 1H), 1.21 (t,  $J = 6.8$  Hz, 3H);  $^{13}\text{C}$  NMR (100 MHz,  $\text{CDCl}_3$ ):  $\delta$  196.8, 156.1, 141.4, 140.0, 135.2, 129.7 ( $\times 2$ ), 129.1 ( $\times 2$ ), 128.8 ( $\times 2$ ), 127.7, 126.5 ( $\times 2$ ), 61.2, 51.9, 44.3, 14.7; IR (KBr):  $\nu_{\text{max}}$  3337, 1690, 1589, 1570, 1530, 1401, 1369, 1260, 1174, 1092, 1048, 1012, 823, 761  $\text{cm}^{-1}$ ; LRMS (ESI<sup>+</sup>):  $m/z$  calcd for  $\text{C}_{18}\text{H}_{19}\text{ClNO}_3$   $[\text{M}+\text{H}]^+$  332.1; found 332.1.<sup>[3]</sup>

2.  $^1\text{H}/^{13}\text{C}$  NMR, IR and HRMS spectra of new compounds 10, 12, and 18–20

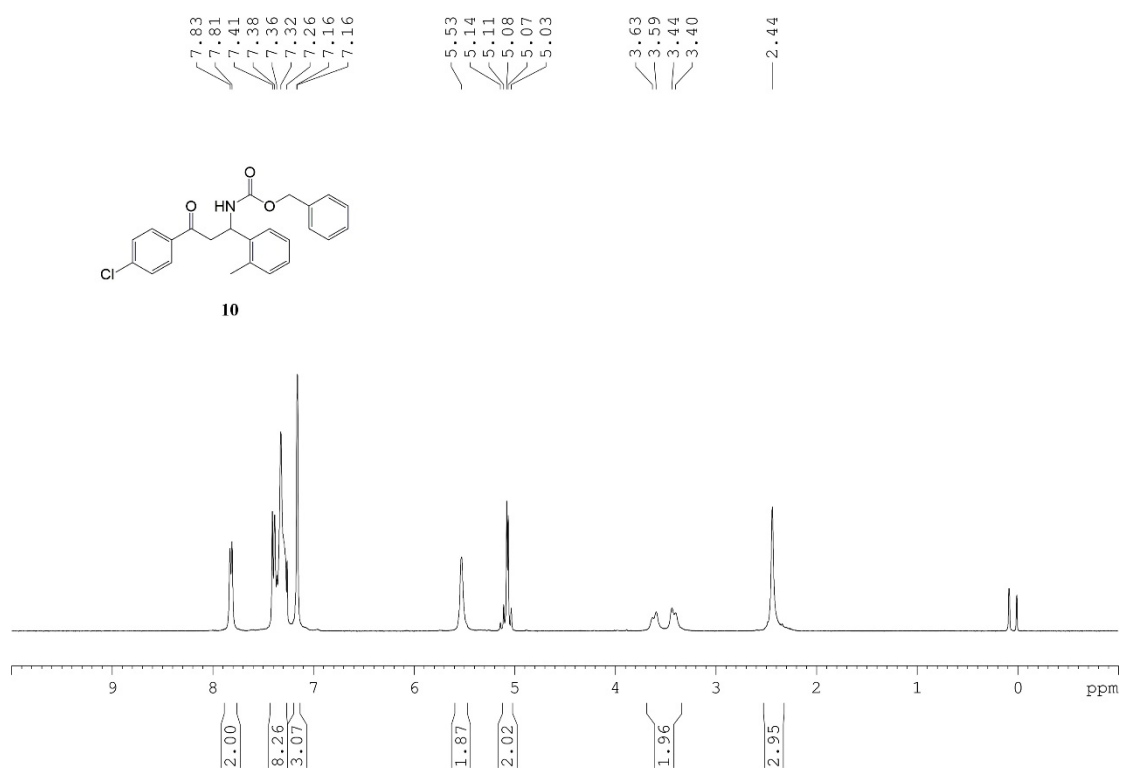

Figure S1.  $^1\text{H}$  NMR spectrum of 10

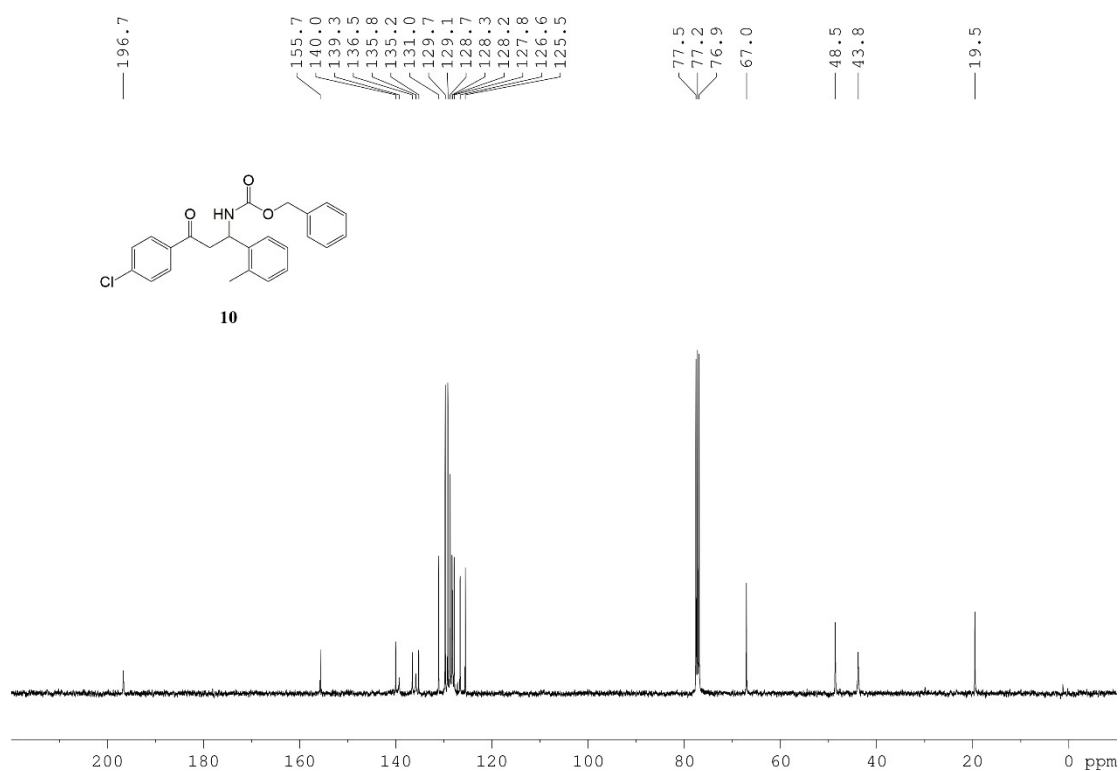

Figure S2.  $^{13}\text{C}$  NMR spectrum of 10

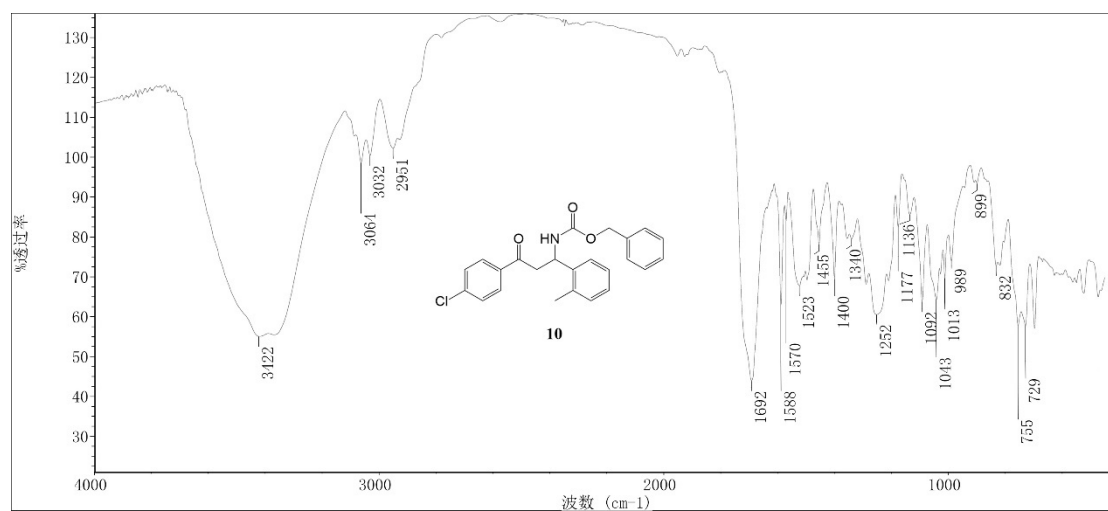

**Figure S3.** IR spectrum of **10**

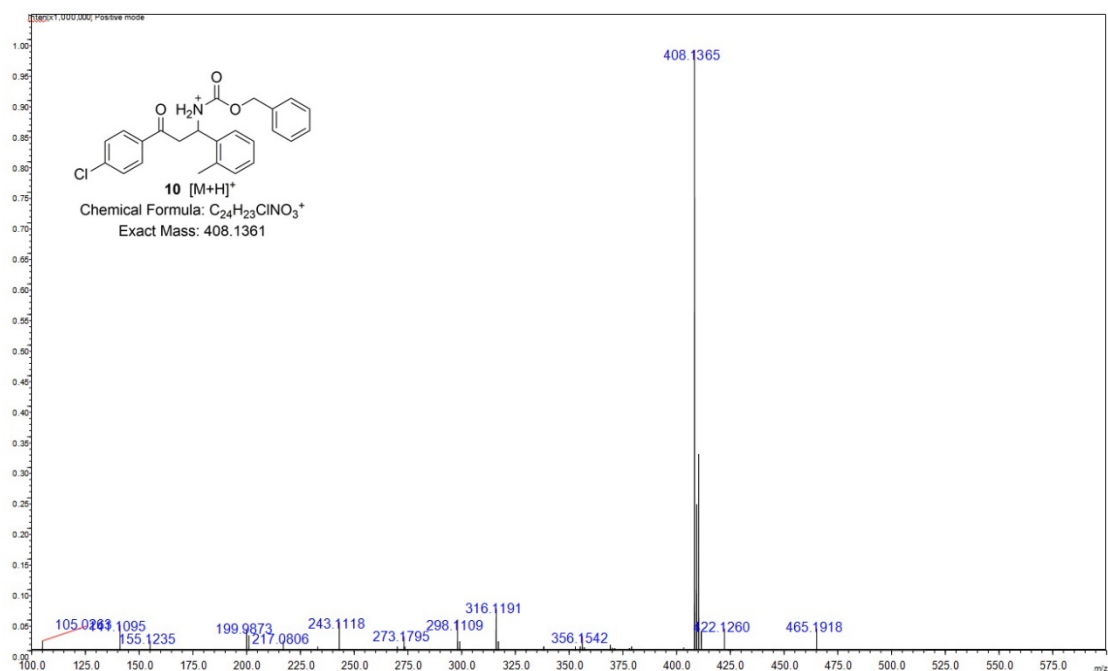

**Figure S4.** HRMS spectrum of **10**



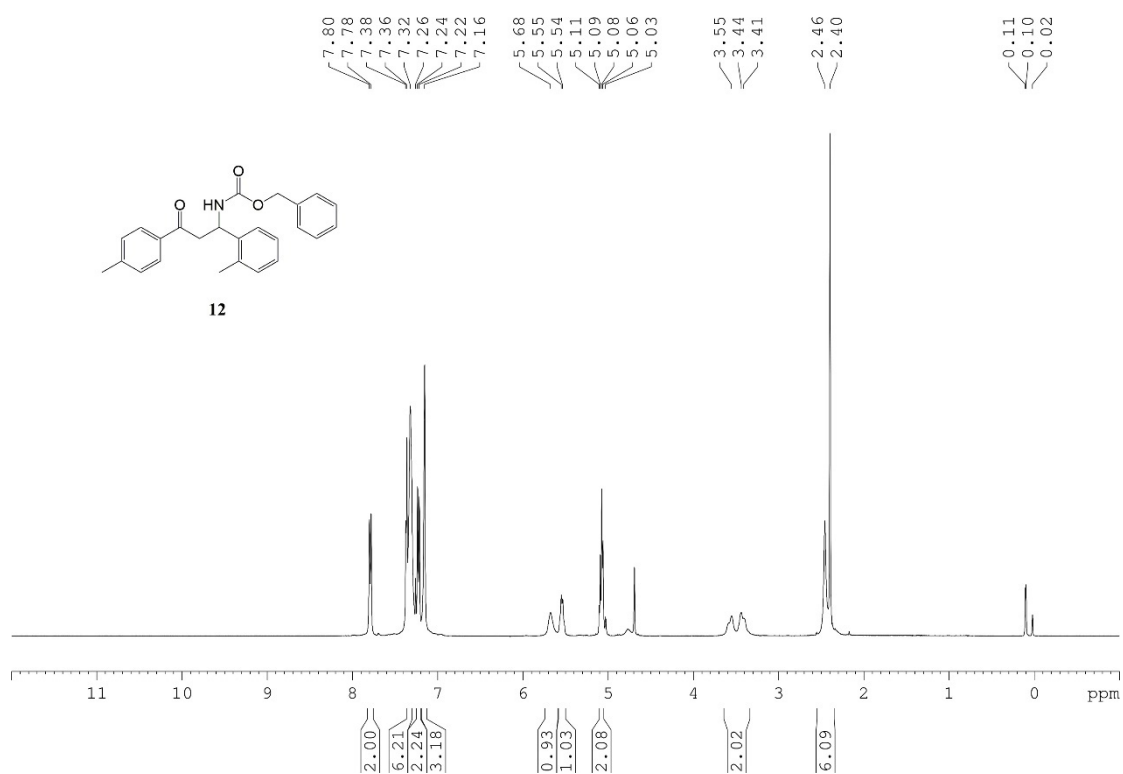

**Figure S5.** <sup>1</sup>H NMR spectrum of **12**

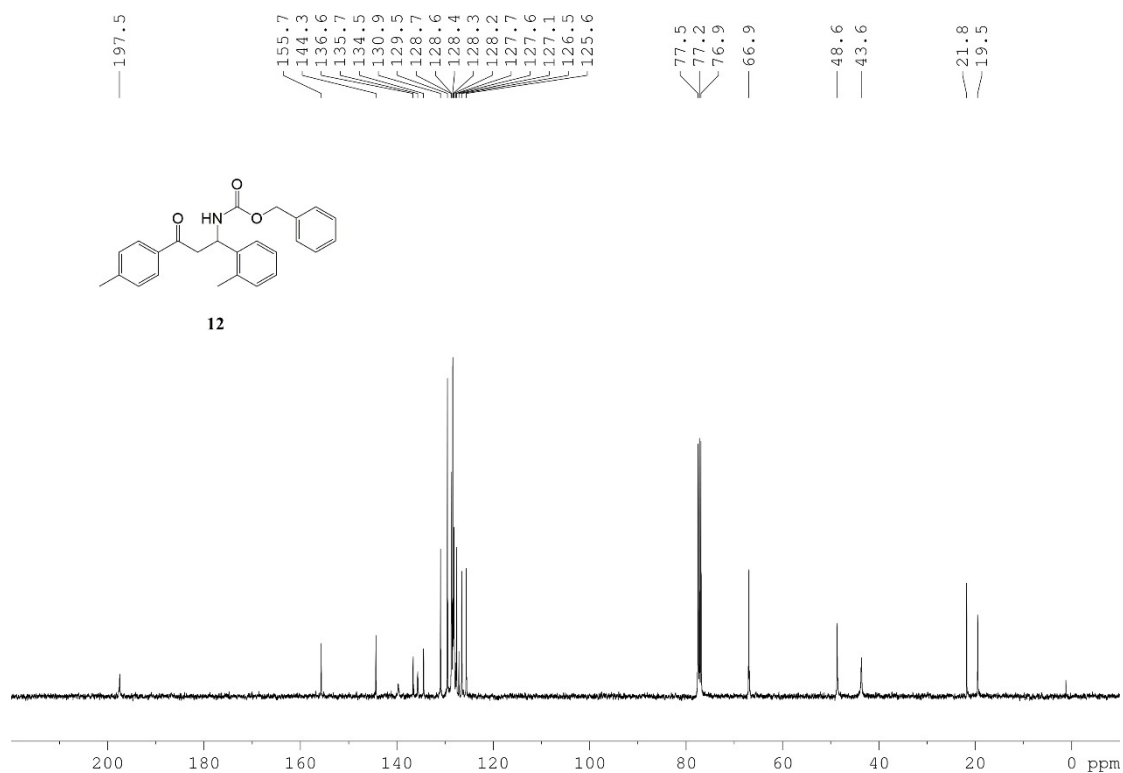

**Figure S6.** <sup>13</sup>C NMR spectrum of **12**

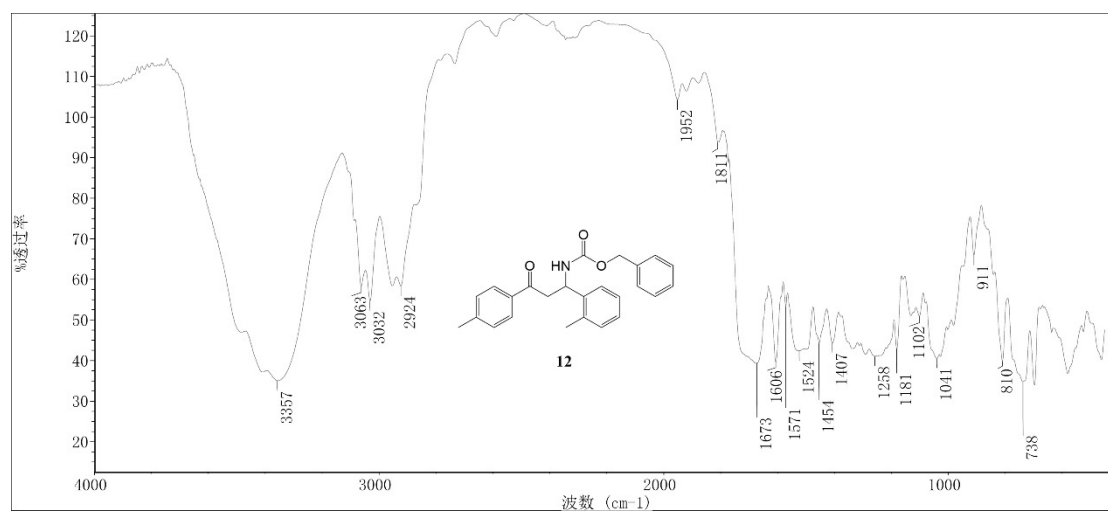

**Figure S7.** IR spectrum of **12**

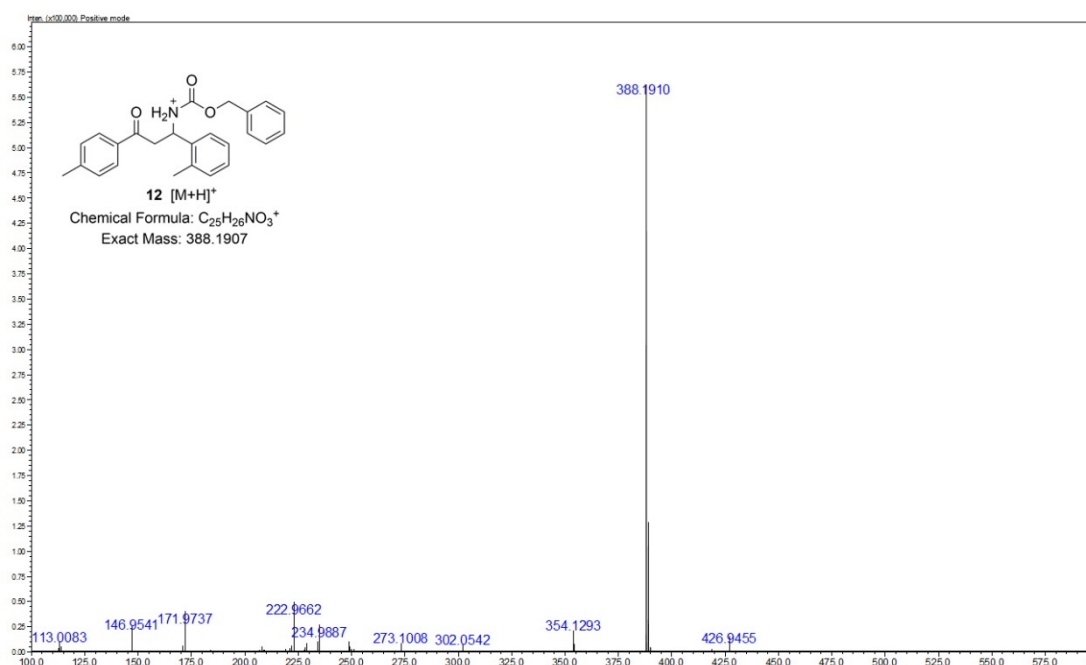

**Figure S8.** HRMS spectrum of **12**

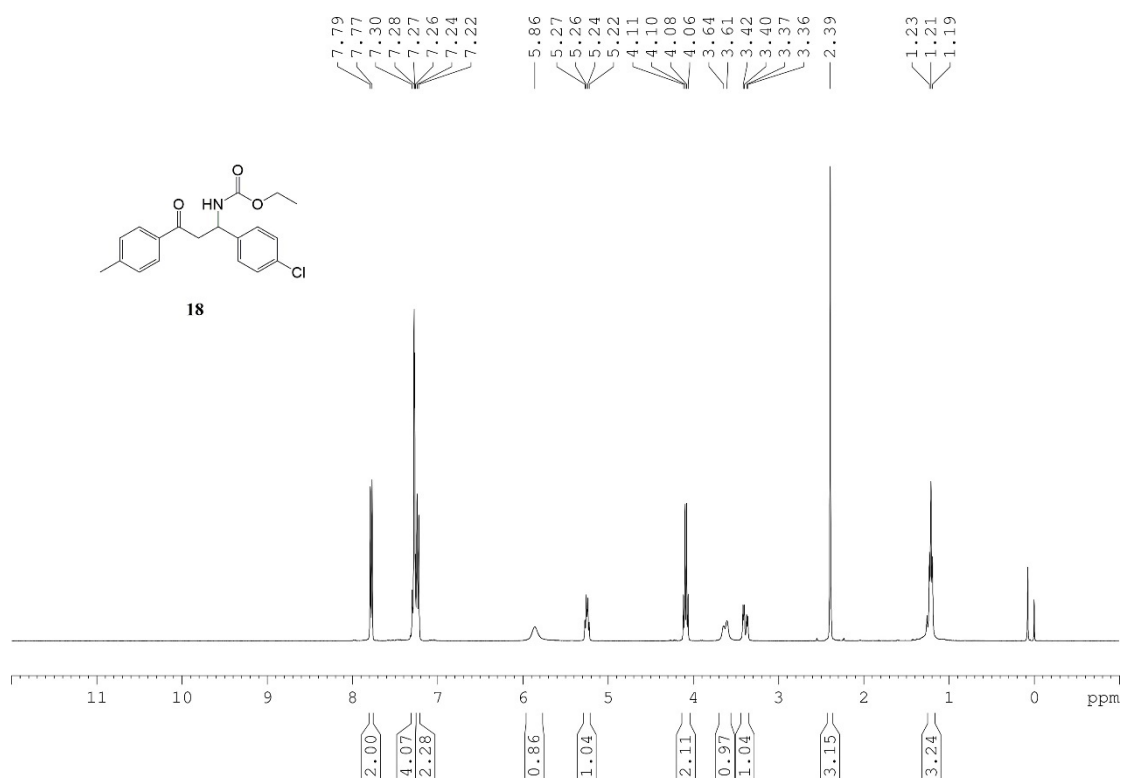

**Figure S9.**  $^1\text{H}$  NMR spectrum of **18**

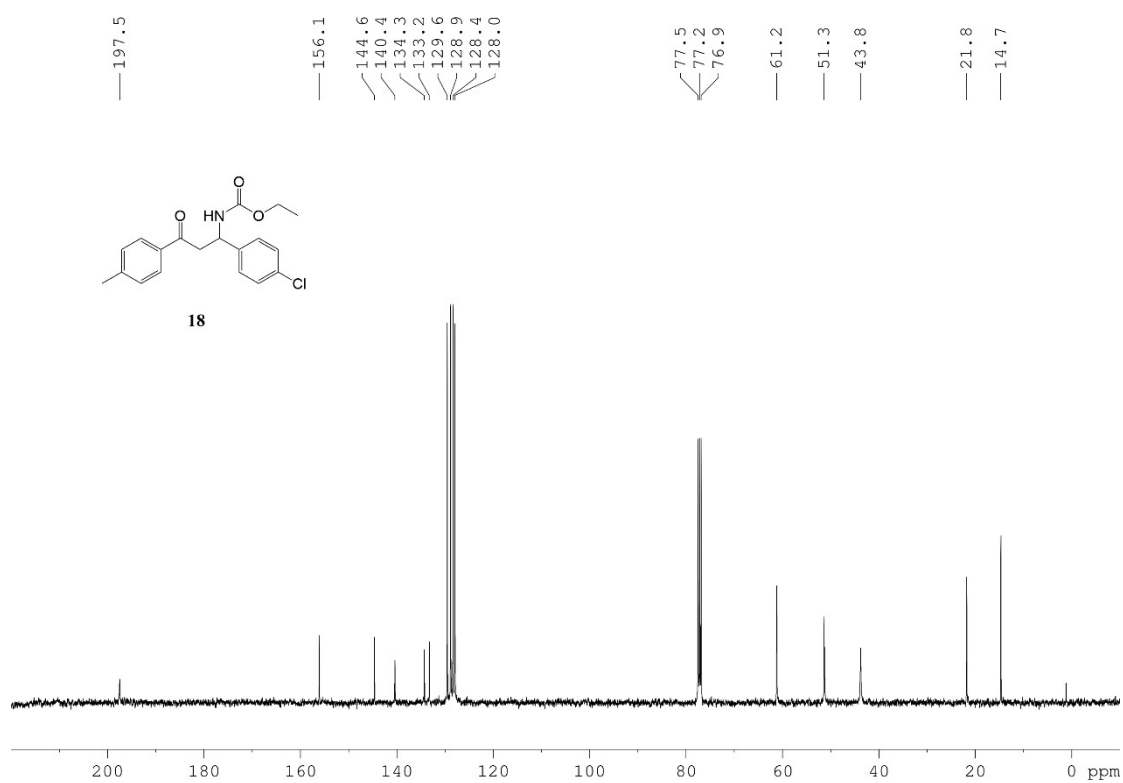

**Figure S10.**  $^{13}\text{C}$  NMR spectrum of **18**

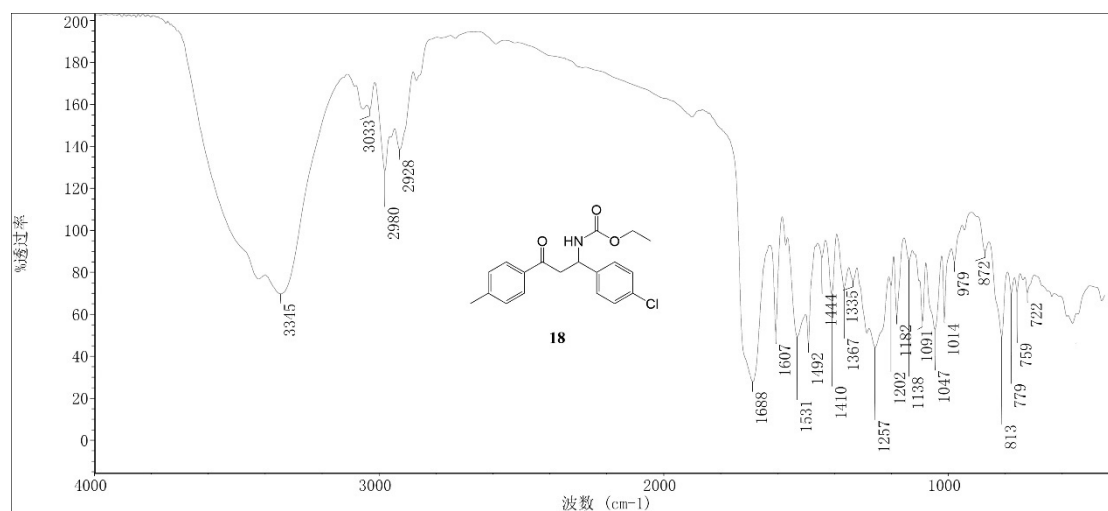

**Figure S11.** IR spectrum of **18**

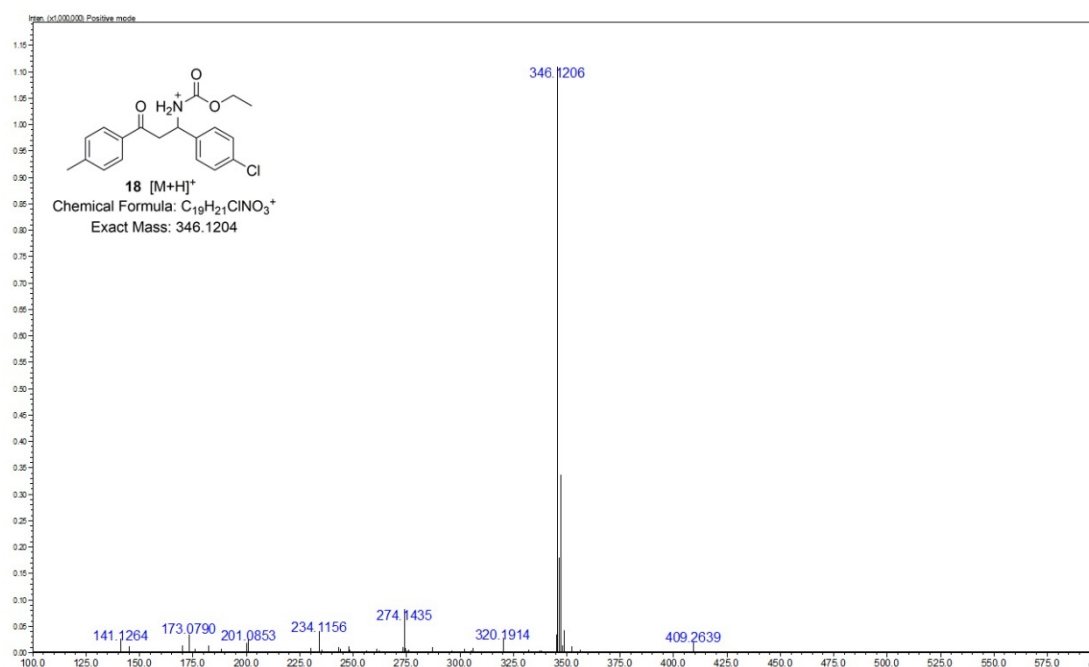

**Figure S12.** HRMS spectrum of **18**

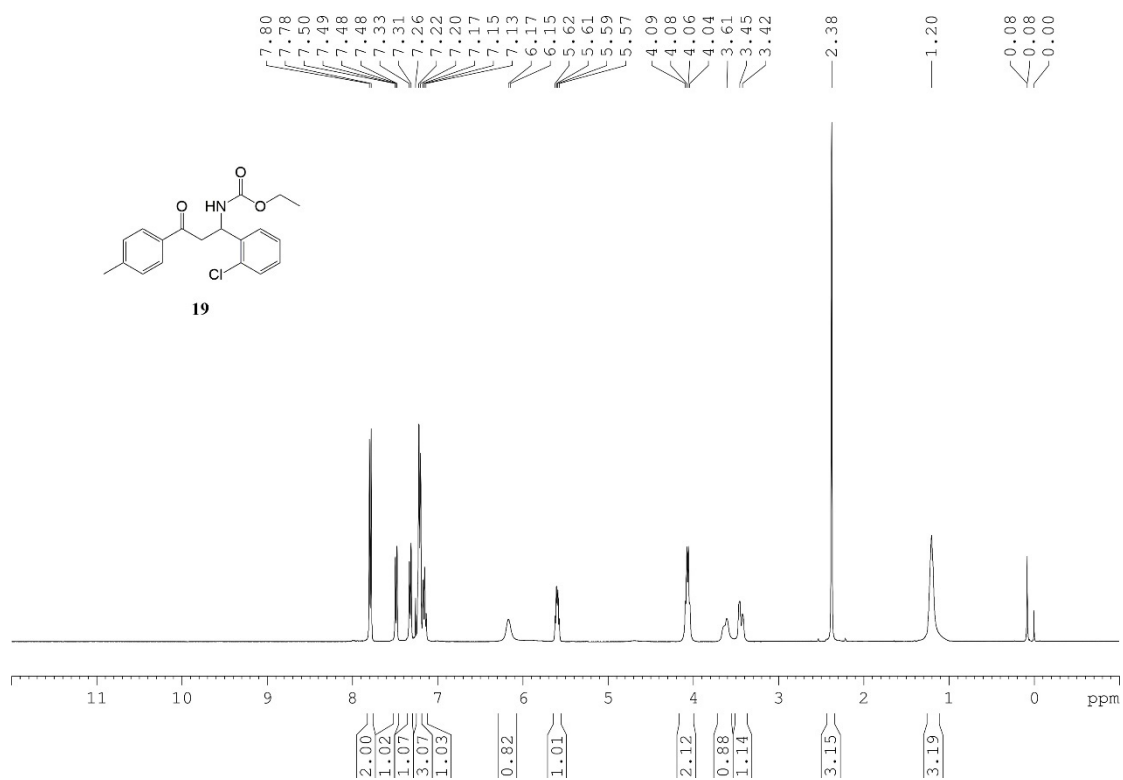

**Figure S13.** <sup>1</sup>H NMR spectrum of **19**

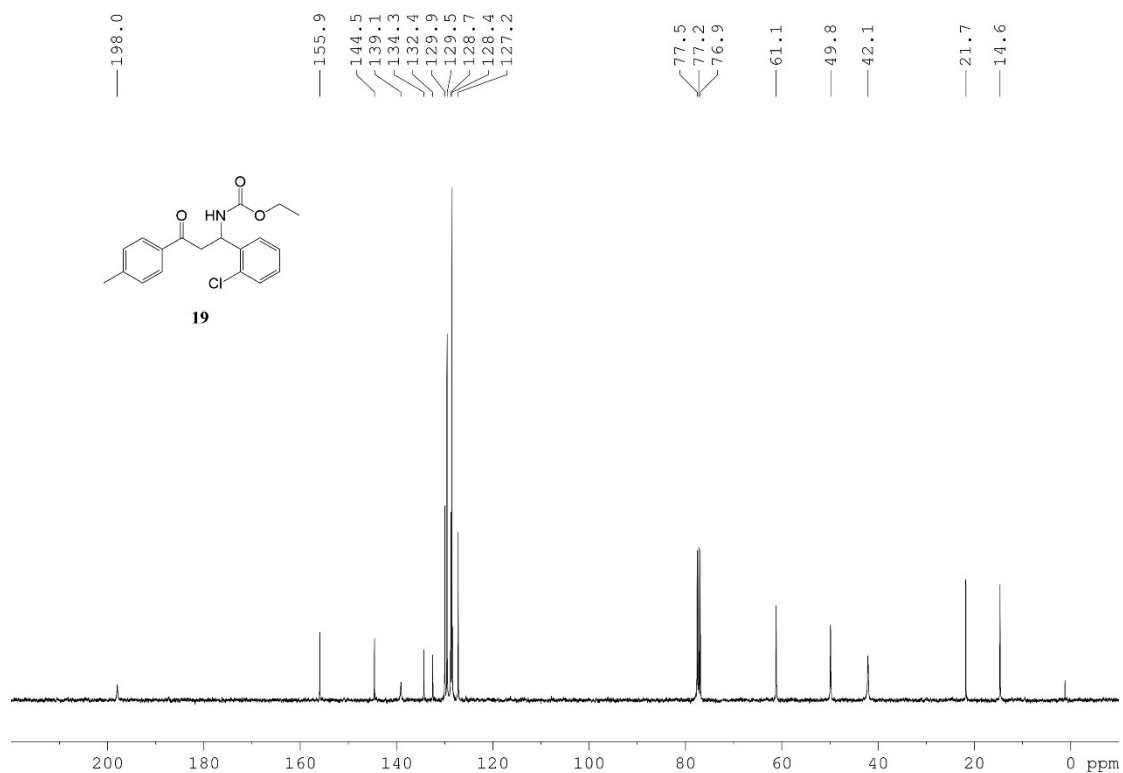

**Figure S14.** <sup>13</sup>C NMR spectrum of **19**

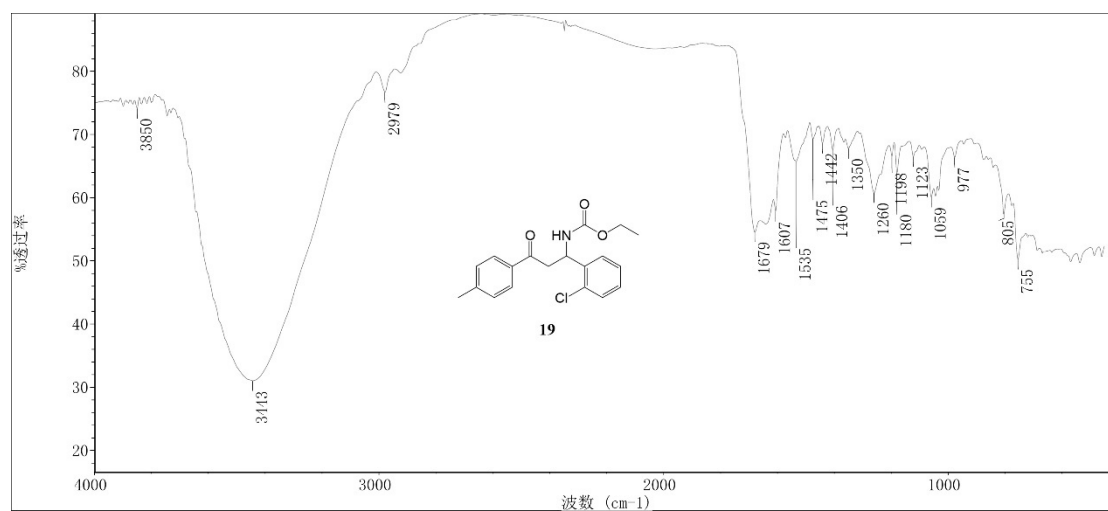

**Figure S15.** IR spectrum of **19**

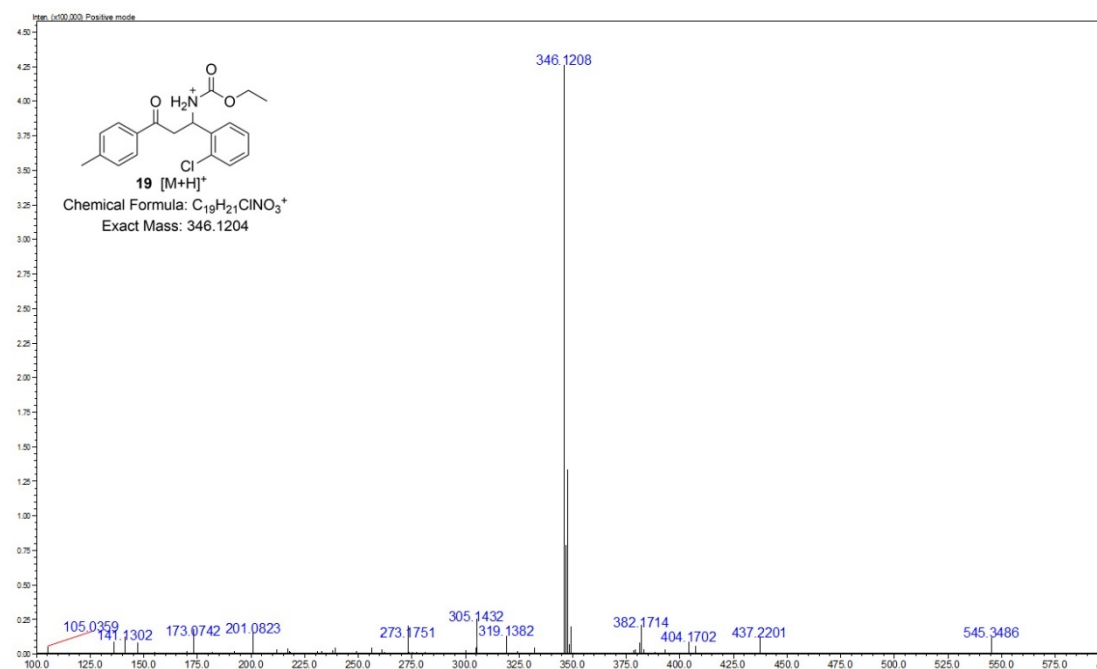

**Figure S16.** HRMS spectrum of **19**

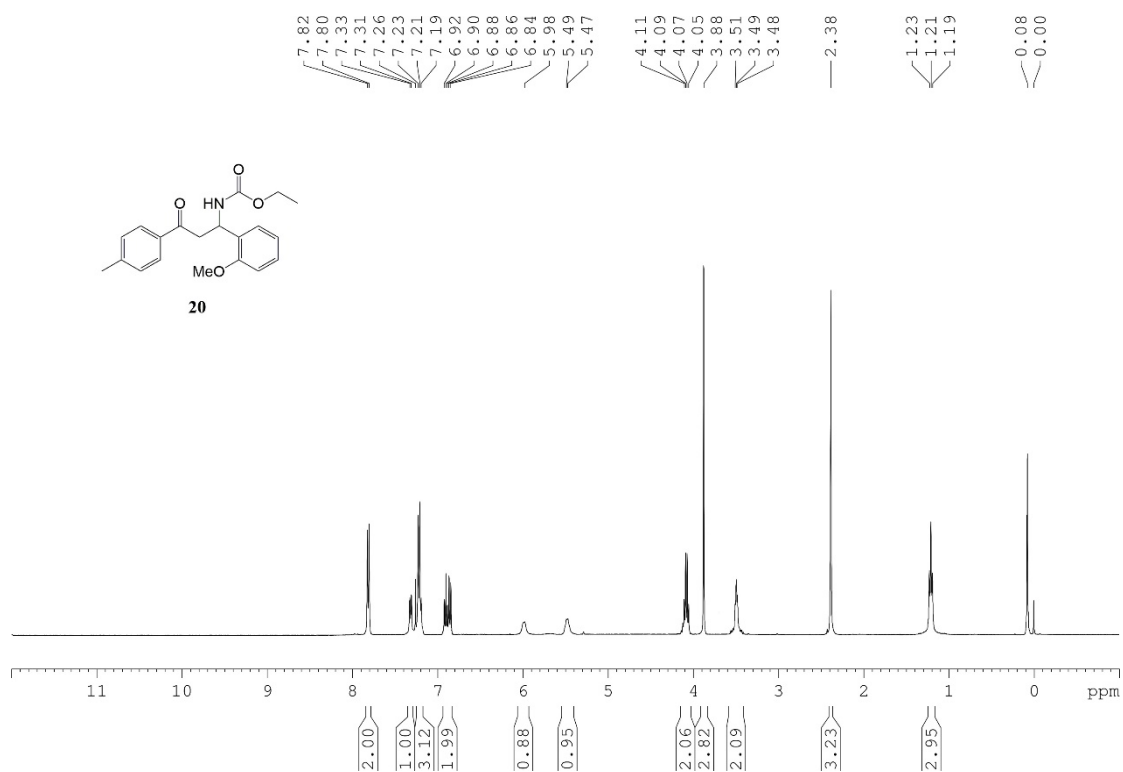

**Figure S17.** <sup>1</sup>H NMR spectrum of **20**

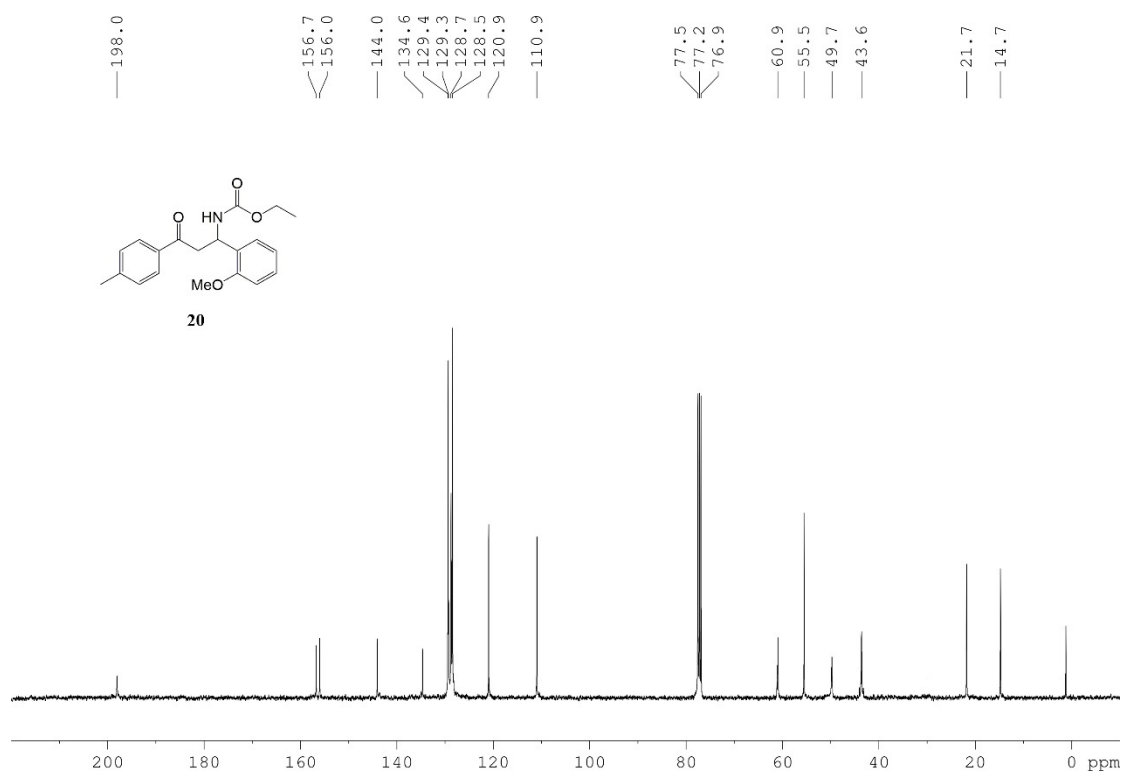

**Figure S18.** <sup>13</sup>C NMR spectrum of **20**

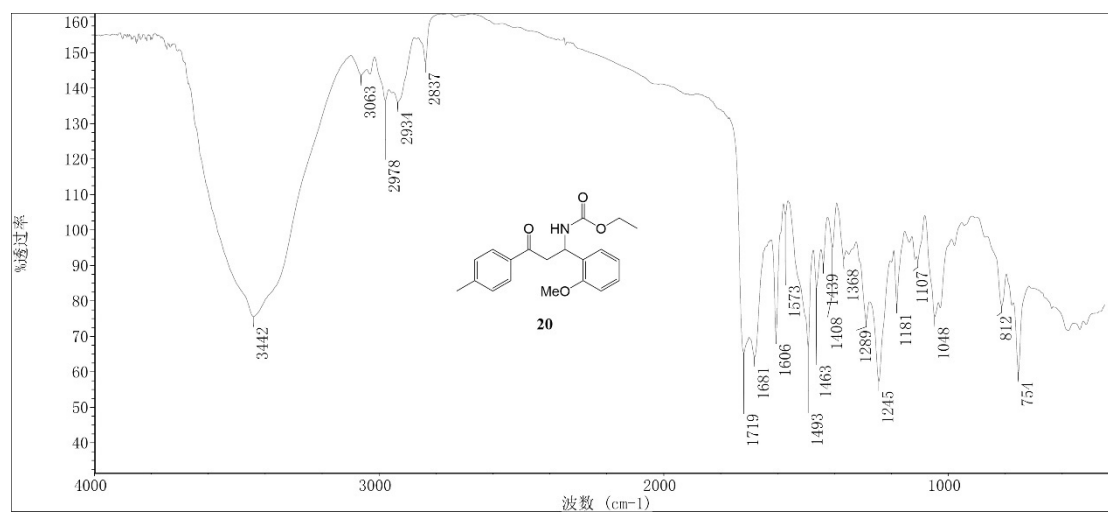

**Figure S19.** IR spectrum of **20**

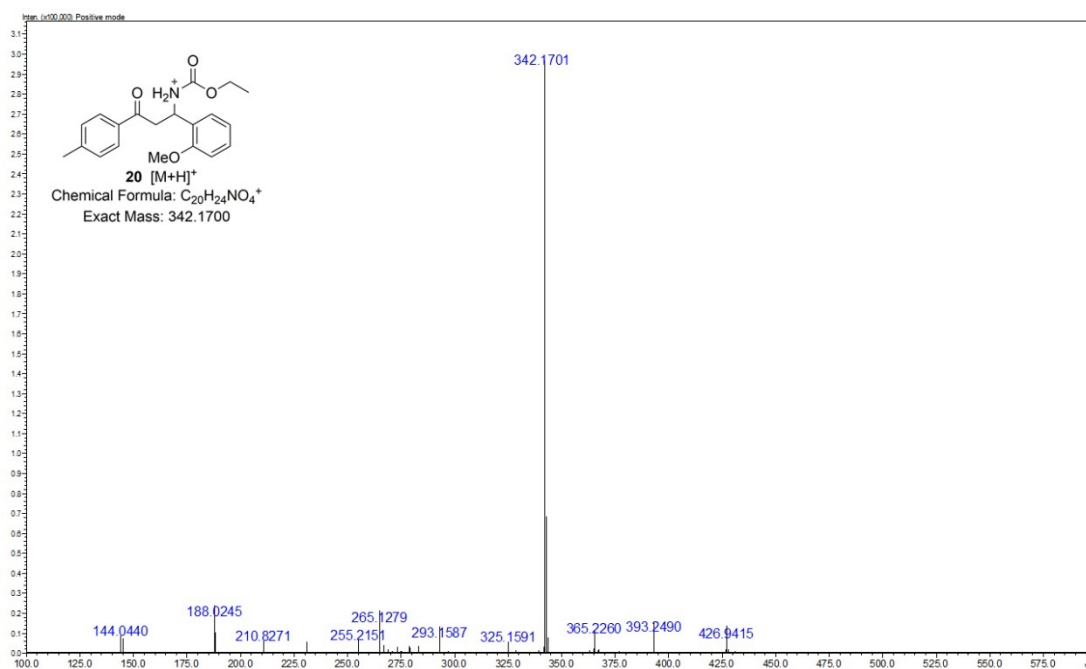

**Figure S20.** HRMS spectrum of **20**



### 3. References

1. Ollevier, T.; Nadeau, E.; Eguillona, J.C. The first catalytic Mannich-type reaction of *N*-alkoxycarbonylamino sulfones with silyl enolates. *Adv. Synth. Catal.* **2006**, *348*, 2080–2084.
2. Phukan, P.; Kataki, D.; Chakraborty, P. Direct synthesis of cbz-protected  $\beta$ -amino ketones by iodine-catalyzed three-component condensation of aldehydes, ketones and benzyl carbamate. *Tetrahedron Lett.* **2006**, *47*, 5523–5525.
3. Wang, R.; Huang, T.; Shi, L.; Li, B.-G.; Lu, X.-X. Heteropoly acids catalyzed direct Mannich reactions: Three-component synthesis of *N*-protected  $\beta$ -amino ketones. *Synlett* **2007**, *14*, 2197–2200.
4. Xu, L.-W.; L, L.; Xia, C.-G. TMSCl-Promoted transition metal-catalyzed aza-Michael reactions of chalcones with carbamates. *Synthesis* **2004**, *13*, 2191–2195.
5. Xu, L.-W.; Xia, C.-G.; Li, L. Transition metal salt-catalyzed direct three-component Mannich reactions of aldehydes, ketones, and carbamates: Efficient synthesis of *N*-protected  $\beta$ -aryl- $\beta$ -amino ketone compounds. *J. Org. Chem.* **2004**, *69*, 8482–8484.
6. Fesenko, A.A.; Shutalev, A.D. Different modes of acid-catalyzed cyclization of 4-( $\gamma$ -oxoalkyl) semicarbazide hydrazones: 7-membered versus 14-membered cyclic semicarbazones formation. *Tetrahedron* **2015**, *71*, 9528–9543.
